# Supplementary material for: Comparative evaluation of different medication safety measures for the emergency department: physicians’ usage and acceptance of training, poster, checklist and computerized decision support
Source: Springer Nature journal article supplement (doi:10.1186/1472-6947-13-79), 2013-07-29
Supplement: 12911_2012_697_MOESM1_ESM.pdf [file 12911_2012_697_MOESM1_ESM.pdf]

Liebe Ärztin, lieber Arzt,

in der ZNA des Klinikums Fürth wurden vor einiger Zeit verschiedene **Maßnahmen zur Verbesserung der Arzneimitteltherapiesicherheit** eingeführt. Diese Einführung wird von uns wissenschaftlich begleitet. Mit dem vorliegenden Fragebogen möchten wir Ihre **Ansichten und Einstellungen** zu diesen Maßnahmen ermitteln. Wir möchten Sie deshalb bitten, sich etwas Zeit zu nehmen und den Fragebogen zu beantworten.

Die Fragen beziehen sich dabei vor allem auf

- die **Schulungen** in der Montagsbesprechung
- die in der ZNA aufgehängten **Informationsposter**
- die **Medikamenten- Checkliste** für die Kitteltasche sowie
- die **Erweiterungen des elektronischen Krankenblattes** um den **Info-Knopf**  (erscheint neben den eingetragenen Medikamenten), die Felder „**Indikation bekannt**“ und „**UAE**“ (unerwünschtes Arzneimittelereignis) sowie den Knopf „**MedikationsCheck**“ (unterhalb der Medikamentenliste; dient dem Abruf von Kontraindikationen und Interaktionen in OntoDrug sowie dem Abruf ausführlicher Fachinformationen in PharmIndex Plus).

Alle Daten werden selbstverständlich **anonym** erhoben, so dass keine Ihrer Aussagen auf Sie persönlich zurückgeführt werden kann. **Bitte antworten Sie ehrlich und lassen Sie möglichst keine der Fragen aus.** Bei Rückfragen wenden Sie sich bitte an die Person, die diesen Fragebogen ausgeteilt hat.

**Herzlichen Dank für Ihre Mitarbeit!**  
Ihr AMTS- Studien- Team

## Teil A: Fragen zur Nutzung der verschiedenen Arzneimitteltherapiesicherheits- (AMTS-) Maßnahmen

Im Folgenden finden Sie eine Reihe von Aussagen zur Nutzung der verschiedenen AMTS- Maßnahmen. Bitte kreuzen Sie die jeweils zutreffende Antwort an oder füllen Sie die Leerstellen aus.

|     |                                                                                                                                                                        |                                                                                                                                                                                                                                                                                                                                                                                                                                                                                                                                                                |                                                                                                                                                                                                                                                          |
|-----|------------------------------------------------------------------------------------------------------------------------------------------------------------------------|----------------------------------------------------------------------------------------------------------------------------------------------------------------------------------------------------------------------------------------------------------------------------------------------------------------------------------------------------------------------------------------------------------------------------------------------------------------------------------------------------------------------------------------------------------------|----------------------------------------------------------------------------------------------------------------------------------------------------------------------------------------------------------------------------------------------------------|
| U1. | Wenn Sie Fragen zu Kontraindikationen und Interaktionen von Medikamenten haben, wie informieren Sie sich <b>im ersten Schritt?</b> (Bitte nur eine Antwort ankreuzen.) | <input type="checkbox"/> ich schaue auf das Informationsposter<br><input type="checkbox"/> ich schaue auf die Checkliste meiner Kitteltasche<br><input type="checkbox"/> ich führe einen elektronischen Medikations-Check durch                                                                                                                                                                                                                                                                                                                                | <input type="checkbox"/> ich frage eine Arbeitskollegin/ einen Arbeitskollegen<br><input type="checkbox"/> ich schaue in der „Roten Liste“ (Printversion) nach<br><input type="checkbox"/> Sonstiges (bitte ergänzen): _____                             |
| U2. | Wurde Ihnen die Benutzung der folgenden AMTS- Maßnahmen vorab erklärt?                                                                                                 | Poster <input type="checkbox"/> ja <input type="checkbox"/> nein<br>Checkliste <input type="checkbox"/> ja <input type="checkbox"/> nein<br>Elektronischer Medikations-Check <input type="checkbox"/> ja <input type="checkbox"/> nein                                                                                                                                                                                                                                                                                                                         |                                                                                                                                                                                                                                                          |
| U3. | Wie oft nutzen Sie die folgenden AMTS- Maßnahmen im Alltag?                                                                                                            | Poster <input type="checkbox"/> nie <input type="checkbox"/> monatlich <input type="checkbox"/> wöchentlich<br>Checkliste <input type="checkbox"/> nie <input type="checkbox"/> monatlich <input type="checkbox"/> wöchentlich<br>Elektronischer Medikations-Check <input type="checkbox"/> nie <input type="checkbox"/> monatlich <input type="checkbox"/> wöchentlich                                                                                                                                                                                        | <input type="checkbox"/> 1x täglich<br><input type="checkbox"/> mehrmals täglich<br><input type="checkbox"/> 1x täglich<br><input type="checkbox"/> mehrmals täglich<br><input type="checkbox"/> 1x täglich<br><input type="checkbox"/> mehrmals täglich |
| U4. | <b>Bei problematischer Arzneiverordnung:</b> Bei wie viel Prozent der von Ihnen durchgeführten Verordnungen verwenden Sie jeweils die folgenden AMTS- Maßnahmen?       | Poster <input type="checkbox"/> nie <input type="checkbox"/> bis 10% <input type="checkbox"/> bis 25% <input type="checkbox"/> bis 50% <input type="checkbox"/> bis 100%<br>Checkliste <input type="checkbox"/> nie <input type="checkbox"/> bis 10% <input type="checkbox"/> bis 25% <input type="checkbox"/> bis 50% <input type="checkbox"/> bis 100%<br>Elektronischer Medikations-Check <input type="checkbox"/> nie <input type="checkbox"/> bis 10% <input type="checkbox"/> bis 25% <input type="checkbox"/> bis 50% <input type="checkbox"/> bis 100% |                                                                                                                                                                                                                                                          |
| U5. | Wann haben Sie die folgenden AMTS- Maßnahmen das letzte Mal benutzt?                                                                                                   | Poster <input type="checkbox"/> noch nie benutzt <input type="checkbox"/> heute <input type="checkbox"/> vor ____ Tagen<br>Checkliste <input type="checkbox"/> noch nie benutzt <input type="checkbox"/> heute <input type="checkbox"/> vor ____ Tagen<br>Elektronischer Medikations-Check <input type="checkbox"/> noch nie benutzt <input type="checkbox"/> heute <input type="checkbox"/> vor ____ Tagen                                                                                                                                                    |                                                                                                                                                                                                                                                          |
| U6. | Auf welche der folgenden Informationsquellen greifen Sie in der Regel bei Nutzung des elektronischen Medikations-Checks zurück? (Mehrfachauswahl möglich.)             | <input type="checkbox"/> Info-Knopf „i“ mit Tooltip (erscheint neben den eingetragenen Medikamenten)<br><input type="checkbox"/> das Feld „Indikation bekannt“<br><input type="checkbox"/> OntoDrug (Informationen zu Kontraindikationen und Interaktionen)<br><input type="checkbox"/> PharmIndex Plus (ausführliche Fachinformationen)<br><input type="checkbox"/> das Feld „UAE“ (unerwünschtes Arzneimittelereignis)<br><input type="checkbox"/> auf keine der genannten Informationsquellen                                                               |                                                                                                                                                                                                                                                          |

|                                                                                |                                                                                                                                                                                                                            |
|--------------------------------------------------------------------------------|----------------------------------------------------------------------------------------------------------------------------------------------------------------------------------------------------------------------------|
| U7.                                                                            | In welchen Situationen (wann) nutzen Sie den elektronischen Medikations- Check? (stichpunktartig)                                                                                                                          |
| <hr/> <hr/> <hr/>                                                              |                                                                                                                                                                                                                            |
| U8.                                                                            | Bei ersten Beobachtungen ist aufgefallen, dass die Maßnahmen Poster, Checkliste und elektronischer Medikations-Check eher selten genutzt werden. Welche Gründe könnte es Ihrer Meinung nach dafür geben? (stichpunktartig) |
| Mögliche Gründe für die seltene Nutzung von Poster und Checkliste:             |                                                                                                                                                                                                                            |
| <hr/> <hr/> <hr/>                                                              |                                                                                                                                                                                                                            |
| Mögliche Gründe für die seltene Nutzung des elektronischen Medikations-Checks: |                                                                                                                                                                                                                            |
| <hr/> <hr/> <hr/>                                                              |                                                                                                                                                                                                                            |
| U9.                                                                            | Was müsste Ihrer Meinung nach getan werden, damit die AMTS-Maßnahmen Poster, Checkliste sowie elektronischer Medikations-Check häufiger genutzt werden? (stichpunktartig)                                                  |
| <hr/> <hr/> <hr/>                                                              |                                                                                                                                                                                                                            |

## Teil B: Fragen zur Akzeptanz der verschiedenen Arzneimitteltherapiesicherheits- (AMTS-) Maßnahmen

Im Folgenden finden Sie eine Reihe von Aussagen zur Akzeptanz der durchgeführten AMTS- Maßnahmen.

Der **erste Zeile jeder Aussage** bezieht sich jeweils auf die **papierbasierten und Schulungsmaßnahmen**, d.h. konkret die **Schulungen („S“)** in der Montags- Frühbesprechung, die aufgehängten **Poster („P“)** zur AMTS und die Medikamenten- **Checkliste („C“)** für die Kitteltasche.

Der **zweite Zeile jeder Aussage** bezieht sich jeweils auf alle **EDV- basierten Maßnahmen („EDV“)** die im elektronischen Krankenblatt in ORBIS umgesetzt wurden, d.h. die **Ankreuzfelder** für „**Indikation bekannt**“ und „**UAE**“ (unerwünschtes Arzneimittelereignis), die **Tooltips**, die bei dem „i“ () für die einzelnen Medikamente erscheinen, die Möglichkeit, über den „**MedikationsCheck**“ -Button Kontraindikationen und Interaktionen zu prüfen und die Möglichkeit, von dort aus in PharmIndex Plus weitere Fachinformationen zum Medikament abzufragen.

Bitte schätzen Sie Ihre Zustimmung zu jeder Aussage auf der daneben befindlichen Skala von „stimmt überhaupt nicht“ bis „stimmt völlig“ ein. Für den Fall, dass Sie sich aus irgendwelchen Gründen nicht dazu äußern wollen oder können oder die jeweiligen Maßnahmen nicht genutzt haben, kreuzen Sie bitte „keine Angabe“ an.

|       |                                                                                                                                      |       | stimmt<br>überhaupt<br>nicht | stimmt<br>eher<br>nicht  | stimmt<br>teils/<br>teils | stimmt<br>eher           | stimmt<br>völlig         | keine<br>Angabe          |
|-------|--------------------------------------------------------------------------------------------------------------------------------------|-------|------------------------------|--------------------------|---------------------------|--------------------------|--------------------------|--------------------------|
| PU1.  | Die in der ZNA eingeführten AMTS-Maßnahmen zur Verbesserung der Arzneimitteltherapiesicherheit halte ich grundsätzlich für sinnvoll. | S/P/C | <input type="checkbox"/>     | <input type="checkbox"/> | <input type="checkbox"/>  | <input type="checkbox"/> | <input type="checkbox"/> | <input type="checkbox"/> |
|       |                                                                                                                                      | EDV   | <input type="checkbox"/>     | <input type="checkbox"/> | <input type="checkbox"/>  | <input type="checkbox"/> | <input type="checkbox"/> | <input type="checkbox"/> |
| PU2.  | Die AMTS- Maßnahmen können mein Arbeitsergebnis verbessern.                                                                          | S/P/C | <input type="checkbox"/>     | <input type="checkbox"/> | <input type="checkbox"/>  | <input type="checkbox"/> | <input type="checkbox"/> | <input type="checkbox"/> |
|       |                                                                                                                                      | EDV   | <input type="checkbox"/>     | <input type="checkbox"/> | <input type="checkbox"/>  | <input type="checkbox"/> | <input type="checkbox"/> | <input type="checkbox"/> |
| PU3.  | Die AMTS- Maßnahmen können meine Qualität der Versorgung verbessern.                                                                 | S/P/C | <input type="checkbox"/>     | <input type="checkbox"/> | <input type="checkbox"/>  | <input type="checkbox"/> | <input type="checkbox"/> | <input type="checkbox"/> |
|       |                                                                                                                                      | EDV   | <input type="checkbox"/>     | <input type="checkbox"/> | <input type="checkbox"/>  | <input type="checkbox"/> | <input type="checkbox"/> | <input type="checkbox"/> |
| PU4.  | Die AMTS- Maßnahmen können meine Effektivität erhöhen.                                                                               | S/P/C | <input type="checkbox"/>     | <input type="checkbox"/> | <input type="checkbox"/>  | <input type="checkbox"/> | <input type="checkbox"/> | <input type="checkbox"/> |
|       |                                                                                                                                      | EDV   | <input type="checkbox"/>     | <input type="checkbox"/> | <input type="checkbox"/>  | <input type="checkbox"/> | <input type="checkbox"/> | <input type="checkbox"/> |
| PU5.  | Die AMTS- Maßnahmen können für meine Arbeit nützlich sein.                                                                           | S/P/C | <input type="checkbox"/>     | <input type="checkbox"/> | <input type="checkbox"/>  | <input type="checkbox"/> | <input type="checkbox"/> | <input type="checkbox"/> |
|       |                                                                                                                                      | EDV   | <input type="checkbox"/>     | <input type="checkbox"/> | <input type="checkbox"/>  | <input type="checkbox"/> | <input type="checkbox"/> | <input type="checkbox"/> |
| EoU1. | Mein Umgang mit den AMTS- Maßnahmen ist einfach und verständlich.                                                                    | S/P/C | <input type="checkbox"/>     | <input type="checkbox"/> | <input type="checkbox"/>  | <input type="checkbox"/> | <input type="checkbox"/> | <input type="checkbox"/> |
|       |                                                                                                                                      | EDV   | <input type="checkbox"/>     | <input type="checkbox"/> | <input type="checkbox"/>  | <input type="checkbox"/> | <input type="checkbox"/> | <input type="checkbox"/> |
| EoU2. | Die AMTS- Maßnahmen sind einfach anzuwenden.                                                                                         | S/P/C | <input type="checkbox"/>     | <input type="checkbox"/> | <input type="checkbox"/>  | <input type="checkbox"/> | <input type="checkbox"/> | <input type="checkbox"/> |
|       |                                                                                                                                      | EDV   | <input type="checkbox"/>     | <input type="checkbox"/> | <input type="checkbox"/>  | <input type="checkbox"/> | <input type="checkbox"/> | <input type="checkbox"/> |

|       |                                                                                                                                  |       | stimmt<br>überhaupt<br>nicht | stimmt<br>eher<br>nicht  | stimmt<br>teils/<br>teils | stimmt<br>eher           | stimmt<br>völlig         | keine<br>Angabe          |
|-------|----------------------------------------------------------------------------------------------------------------------------------|-------|------------------------------|--------------------------|---------------------------|--------------------------|--------------------------|--------------------------|
| EoU3. | Der Umgang mit den AMTS- Maßnahmen erfordert wenig geistige Anstrengung.                                                         | S/P/C | <input type="checkbox"/>     | <input type="checkbox"/> | <input type="checkbox"/>  | <input type="checkbox"/> | <input type="checkbox"/> | <input type="checkbox"/> |
|       |                                                                                                                                  | EDV   | <input type="checkbox"/>     | <input type="checkbox"/> | <input type="checkbox"/>  | <input type="checkbox"/> | <input type="checkbox"/> | <input type="checkbox"/> |
| EoU4. | Die AMTS- Maßnahmen liefern genau das, was ich von ihnen erwarte.                                                                | S/P/C | <input type="checkbox"/>     | <input type="checkbox"/> | <input type="checkbox"/>  | <input type="checkbox"/> | <input type="checkbox"/> | <input type="checkbox"/> |
|       |                                                                                                                                  | EDV   | <input type="checkbox"/>     | <input type="checkbox"/> | <input type="checkbox"/>  | <input type="checkbox"/> | <input type="checkbox"/> | <input type="checkbox"/> |
| SN1.  | Kollegen/-innen, die mein Verhalten beeinflussen, meinen, dass ich die AMTS- Maßnahmen anwenden sollte.                          | S/P/C | <input type="checkbox"/>     | <input type="checkbox"/> | <input type="checkbox"/>  | <input type="checkbox"/> | <input type="checkbox"/> | <input type="checkbox"/> |
|       |                                                                                                                                  | EDV   | <input type="checkbox"/>     | <input type="checkbox"/> | <input type="checkbox"/>  | <input type="checkbox"/> | <input type="checkbox"/> | <input type="checkbox"/> |
| IM1.  | Über die AMTS- Maßnahmen zu verfügen ist ein Hervorhebungsmerkmal.                                                               | S/P/C | <input type="checkbox"/>     | <input type="checkbox"/> | <input type="checkbox"/>  | <input type="checkbox"/> | <input type="checkbox"/> | <input type="checkbox"/> |
|       |                                                                                                                                  | EDV   | <input type="checkbox"/>     | <input type="checkbox"/> | <input type="checkbox"/>  | <input type="checkbox"/> | <input type="checkbox"/> | <input type="checkbox"/> |
| IM2.  | Kollegen/- innen, die die AMTS- Maßnahmen anwenden sind besser angesehen als diejenigen, die die AMTS- Maßnahmen nicht anwenden. | S/P/C | <input type="checkbox"/>     | <input type="checkbox"/> | <input type="checkbox"/>  | <input type="checkbox"/> | <input type="checkbox"/> | <input type="checkbox"/> |
|       |                                                                                                                                  | EDV   | <input type="checkbox"/>     | <input type="checkbox"/> | <input type="checkbox"/>  | <input type="checkbox"/> | <input type="checkbox"/> | <input type="checkbox"/> |
| IM3.  | Kollegen/-innen, die die AMTS-Maßnahmen anwenden, haben eine höhere Bekanntheit.                                                 | S/P/C | <input type="checkbox"/>     | <input type="checkbox"/> | <input type="checkbox"/>  | <input type="checkbox"/> | <input type="checkbox"/> | <input type="checkbox"/> |
|       |                                                                                                                                  | EDV   | <input type="checkbox"/>     | <input type="checkbox"/> | <input type="checkbox"/>  | <input type="checkbox"/> | <input type="checkbox"/> | <input type="checkbox"/> |
| VO1.  | Die Anwendung der AMTS-Maßnahmen ist freiwillig.                                                                                 | S/P/C | <input type="checkbox"/>     | <input type="checkbox"/> | <input type="checkbox"/>  | <input type="checkbox"/> | <input type="checkbox"/> | <input type="checkbox"/> |
|       |                                                                                                                                  | EDV   | <input type="checkbox"/>     | <input type="checkbox"/> | <input type="checkbox"/>  | <input type="checkbox"/> | <input type="checkbox"/> | <input type="checkbox"/> |
| JR1.  | Die AMTS- Maßnahmen anzuwenden, ist sachdienlich für die Patientenversorgung.                                                    | S/P/C | <input type="checkbox"/>     | <input type="checkbox"/> | <input type="checkbox"/>  | <input type="checkbox"/> | <input type="checkbox"/> | <input type="checkbox"/> |
|       |                                                                                                                                  | EDV   | <input type="checkbox"/>     | <input type="checkbox"/> | <input type="checkbox"/>  | <input type="checkbox"/> | <input type="checkbox"/> | <input type="checkbox"/> |
| JR2.  | Die AMTS- Maßnahmen anzuwenden ist wichtig für die Patientenversorgung.                                                          | S/P/C | <input type="checkbox"/>     | <input type="checkbox"/> | <input type="checkbox"/>  | <input type="checkbox"/> | <input type="checkbox"/> | <input type="checkbox"/> |
|       |                                                                                                                                  | EDV   | <input type="checkbox"/>     | <input type="checkbox"/> | <input type="checkbox"/>  | <input type="checkbox"/> | <input type="checkbox"/> | <input type="checkbox"/> |
| COM   | Die Benutzung der AMTS- Maßnahmen passt zu meinem Arbeitsablauf.                                                                 | S/P/C | <input type="checkbox"/>     | <input type="checkbox"/> | <input type="checkbox"/>  | <input type="checkbox"/> | <input type="checkbox"/> | <input type="checkbox"/> |
|       |                                                                                                                                  | EDV   | <input type="checkbox"/>     | <input type="checkbox"/> | <input type="checkbox"/>  | <input type="checkbox"/> | <input type="checkbox"/> | <input type="checkbox"/> |
| OQ1.  | Die Qualität der fachlichen Informationen der AMTS- Maßnahmen ist hoch.                                                          | S/P/C | <input type="checkbox"/>     | <input type="checkbox"/> | <input type="checkbox"/>  | <input type="checkbox"/> | <input type="checkbox"/> | <input type="checkbox"/> |
|       |                                                                                                                                  | EDV   | <input type="checkbox"/>     | <input type="checkbox"/> | <input type="checkbox"/>  | <input type="checkbox"/> | <input type="checkbox"/> | <input type="checkbox"/> |
| RD1.  | Die AMTS- Maßnahmen können die Kosten meiner medizinischen Versorgung senken.                                                    | S/P/C | <input type="checkbox"/>     | <input type="checkbox"/> | <input type="checkbox"/>  | <input type="checkbox"/> | <input type="checkbox"/> | <input type="checkbox"/> |
|       |                                                                                                                                  | EDV   | <input type="checkbox"/>     | <input type="checkbox"/> | <input type="checkbox"/>  | <input type="checkbox"/> | <input type="checkbox"/> | <input type="checkbox"/> |
| RD2.  | Ich glaube, ich kann Anderen die Auswirkungen der AMTS- Maßnahmen vermitteln.                                                    | S/P/C | <input type="checkbox"/>     | <input type="checkbox"/> | <input type="checkbox"/>  | <input type="checkbox"/> | <input type="checkbox"/> | <input type="checkbox"/> |
|       |                                                                                                                                  | EDV   | <input type="checkbox"/>     | <input type="checkbox"/> | <input type="checkbox"/>  | <input type="checkbox"/> | <input type="checkbox"/> | <input type="checkbox"/> |
| RD3.  | Die Auswirkungen der AMTS- Maßnahmen sind für mich offensichtlich.                                                               | S/P/C | <input type="checkbox"/>     | <input type="checkbox"/> | <input type="checkbox"/>  | <input type="checkbox"/> | <input type="checkbox"/> | <input type="checkbox"/> |
|       |                                                                                                                                  | EDV   | <input type="checkbox"/>     | <input type="checkbox"/> | <input type="checkbox"/>  | <input type="checkbox"/> | <input type="checkbox"/> | <input type="checkbox"/> |
| RD4.  | Ich habe keine Schwierigkeiten zu erklären, warum die Verwendung der AMTS- Maßnahmen nützlich ist.                               | S/P/C | <input type="checkbox"/>     | <input type="checkbox"/> | <input type="checkbox"/>  | <input type="checkbox"/> | <input type="checkbox"/> | <input type="checkbox"/> |
|       |                                                                                                                                  | EDV   | <input type="checkbox"/>     | <input type="checkbox"/> | <input type="checkbox"/>  | <input type="checkbox"/> | <input type="checkbox"/> | <input type="checkbox"/> |
| RtC1. | Ich möchte nicht, dass die AMTS- Maßnahmen die Art verändern, wie ich Medikamente verordne.                                      | S/P/C | <input type="checkbox"/>     | <input type="checkbox"/> | <input type="checkbox"/>  | <input type="checkbox"/> | <input type="checkbox"/> | <input type="checkbox"/> |
|       |                                                                                                                                  | EDV   | <input type="checkbox"/>     | <input type="checkbox"/> | <input type="checkbox"/>  | <input type="checkbox"/> | <input type="checkbox"/> | <input type="checkbox"/> |
| RtC3. | Alles in allem möchte ich nicht, dass die AMTS- Maßnahmen die Art verändern, wie ich aktuell arbeite.                            | S/P/C | <input type="checkbox"/>     | <input type="checkbox"/> | <input type="checkbox"/>  | <input type="checkbox"/> | <input type="checkbox"/> | <input type="checkbox"/> |
|       |                                                                                                                                  | EDV   | <input type="checkbox"/>     | <input type="checkbox"/> | <input type="checkbox"/>  | <input type="checkbox"/> | <input type="checkbox"/> | <input type="checkbox"/> |
| ItU1. | Sobald die erheblichen Hürden für die Nutzung überwunden sind, plane ich die AMTS- Maßnahmen zu nutzen.                          | S/P/C | <input type="checkbox"/>     | <input type="checkbox"/> | <input type="checkbox"/>  | <input type="checkbox"/> | <input type="checkbox"/> | <input type="checkbox"/> |
|       |                                                                                                                                  | EDV   | <input type="checkbox"/>     | <input type="checkbox"/> | <input type="checkbox"/>  | <input type="checkbox"/> | <input type="checkbox"/> | <input type="checkbox"/> |
| ItU2. | Wenn die erheblichen Hürden für die Nutzung nicht existieren würden, würde ich die AMTS- Maßnahmen nutzen.                       | S/P/C | <input type="checkbox"/>     | <input type="checkbox"/> | <input type="checkbox"/>  | <input type="checkbox"/> | <input type="checkbox"/> | <input type="checkbox"/> |
|       |                                                                                                                                  | EDV   | <input type="checkbox"/>     | <input type="checkbox"/> | <input type="checkbox"/>  | <input type="checkbox"/> | <input type="checkbox"/> | <input type="checkbox"/> |

|       | Für wie geeignet halten Sie die folgenden AMTS-Maßnahmen?                                        | überhaupt nicht geeignet | eher nicht geeignet      | teilweise geeignet       | eher geeignet            | völlig geeignet          | keine Angabe             |
|-------|--------------------------------------------------------------------------------------------------|--------------------------|--------------------------|--------------------------|--------------------------|--------------------------|--------------------------|
| EIG1. | Schulungen                                                                                       | <input type="checkbox"/> | <input type="checkbox"/> | <input type="checkbox"/> | <input type="checkbox"/> | <input type="checkbox"/> | <input type="checkbox"/> |
| EIG2. | Informationsposter                                                                               | <input type="checkbox"/> | <input type="checkbox"/> | <input type="checkbox"/> | <input type="checkbox"/> | <input type="checkbox"/> | <input type="checkbox"/> |
| EIG3. | Medikamenten- Checkliste für die Kitteltasche                                                    | <input type="checkbox"/> | <input type="checkbox"/> | <input type="checkbox"/> | <input type="checkbox"/> | <input type="checkbox"/> | <input type="checkbox"/> |
| EIG4. | Info- Knopf „i“ mit Tooltip (im elektronischen Krankenblatt)                                     | <input type="checkbox"/> | <input type="checkbox"/> | <input type="checkbox"/> | <input type="checkbox"/> | <input type="checkbox"/> | <input type="checkbox"/> |
| EIG5. | das Feld „Indikation bekannt“ (im elektronischen Krankenblatt)                                   | <input type="checkbox"/> | <input type="checkbox"/> | <input type="checkbox"/> | <input type="checkbox"/> | <input type="checkbox"/> | <input type="checkbox"/> |
| EIG6. | OntoDrug- Informationen zu Kontraindikationen und Interaktionen (im elektronischen Krankenblatt) | <input type="checkbox"/> | <input type="checkbox"/> | <input type="checkbox"/> | <input type="checkbox"/> | <input type="checkbox"/> | <input type="checkbox"/> |
| EIG7. | PharmIndex Plus- ausführliche Fachinformationen (im elektronischen Krankenblatt)                 | <input type="checkbox"/> | <input type="checkbox"/> | <input type="checkbox"/> | <input type="checkbox"/> | <input type="checkbox"/> | <input type="checkbox"/> |
| EIG8. | das Feld „UAE“- unerwünschtes Arzneimittelereignis (im elektronischen Krankenblatt)              | <input type="checkbox"/> | <input type="checkbox"/> | <input type="checkbox"/> | <input type="checkbox"/> | <input type="checkbox"/> | <input type="checkbox"/> |

Ein Fragebogen kann nicht alle Aspekte ansprechen. Dieser Teil des Fragebogens ist für Ihre individuellen Anmerkungen reserviert. **Möchten Sie uns noch auf etwas aufmerksam machen?** (stichpunktartig)

---



---



---



---

### Teil C: Fragen zur Person- Diese Angaben sind freiwillig!

Abschließend bitten wir Sie noch, uns einige Fragen zu Ihrer Person zu beantworten. **Alle Angaben sind freiwillig**, sie unterstützen uns aber bei der statistischen Auswertung dieses Fragebogens.

|       |                                                                                        |                                                                                                                                                      |                                                                                                                                                  |
|-------|----------------------------------------------------------------------------------------|------------------------------------------------------------------------------------------------------------------------------------------------------|--------------------------------------------------------------------------------------------------------------------------------------------------|
| DG3.  | Zu welcher Berufsgruppe gehören Sie?                                                   | <input type="checkbox"/> Oberarzt/-ärztin ZNA<br><input type="checkbox"/> Facharzt/-ärztin ZNA<br><input type="checkbox"/> Assistenzarzt/-ärztin ZNA | <input type="checkbox"/> Facharzt/-ärztin Med1/Med2<br><input type="checkbox"/> Assistenzarzt/-ärztin Med1/ Med2<br><input type="checkbox"/> AiP |
| EXP1. | Wie lange arbeiten Sie schon als Arzt/ Ärztin (mit AiP)?                               | seit _____ Jahren                                                                                                                                    |                                                                                                                                                  |
| EXP2. | Wie lange arbeiten Sie schon mit elektronischen Patientenakten?                        | seit _____ Jahren                                                                                                                                    |                                                                                                                                                  |
| EXP3. | Wie schätzen Ihre Computerkenntnisse im Allgemeinen ein?                               | <input type="checkbox"/> gering                                                                                                                      | <input type="checkbox"/> mittelmäßig <input type="checkbox"/> hoch                                                                               |
| KENN  | Bitte bilden Sie sich Ihr individuelles Kennwort (Aus Datenschutzgründen, statt Name): | _____<br>Anfangsbuchstabe<br>Ihres Geburtsortes                                                                                                      | _____<br>Endbuchstabe<br>des Vornamens<br>Ihrer Mutter                                                                                           |
|       |                                                                                        | _____<br>Anfangsbuchstabe<br>des Vornamens<br>Ihrer Mutter                                                                                           | _____<br>Endbuchstabe<br>Ihres eigenen<br>ersten Vornamens                                                                                       |

**Wir bedanken uns sehr herzlich für Ihre Mühe und Zeit!**
